# Supplementary material for: Spiral gas–solid two-phase flow continuous mechanochemical synthesis of salophen complexes and catalytic thermal decomposition of ammonium perchlorate
Source: Royal Society of Chemistry journal article supplement (doi:10.1039/d3dt03644h), 2024-01-01
Supplement: d3dt03644h1.pdf [file d3dt03644h1.pdf]

## Supporting Information

### **Spiral gas-solid two-phase flow continuous mechanochemical synthesis salophen complex and catalytic performance research on the thermal decomposition of ammonium perchlorate**

Yong Song, Zhiyuan Jin, Juan Zhang, Bo Jin\* and Rufang Peng\*

*State Key Laboratory of Environment-friendly Energy Materials, School of Materials  
and Chemistry, Southwest University of Science and Technology, Mianyang, 621010,  
China*

\* Corresponding author. E-mail: jinbo0428@163.com; rfpeng2006@163.com

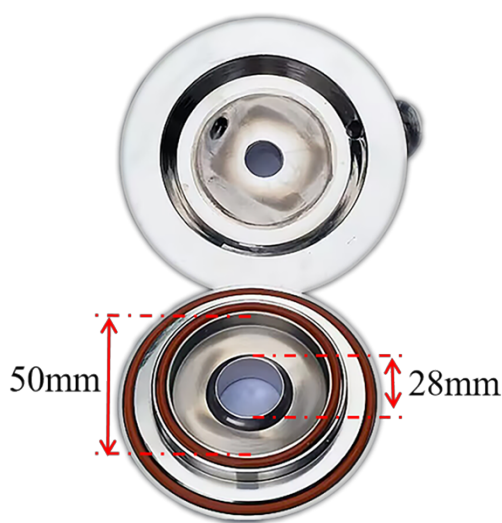

**Figure S1. Physical diagram and size of the reaction chamber.**

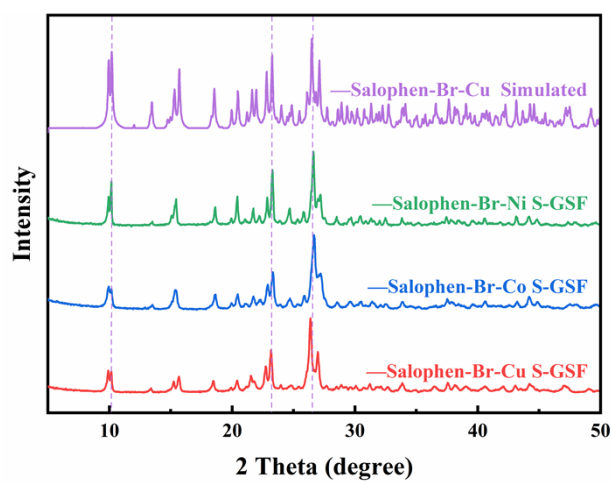

Figure S2 XRD patterns of salophen-Br-Cu, salophen-Br-Cu, salophen-Br-Cu after normalizing the XRD data, and simulated salophen-Br-Cu.

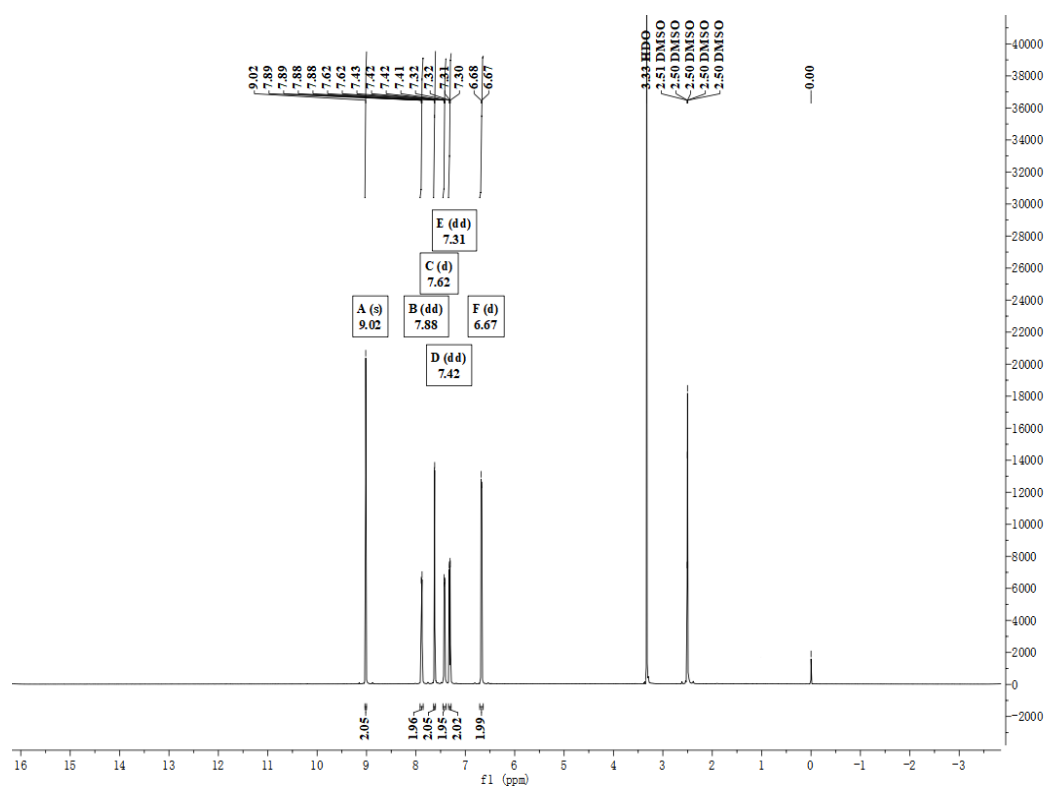

Figure S3.  $^1\text{H}$  NMR spectrum of salophen-Br-Zn in  $\text{d}_6$ -DMSO.

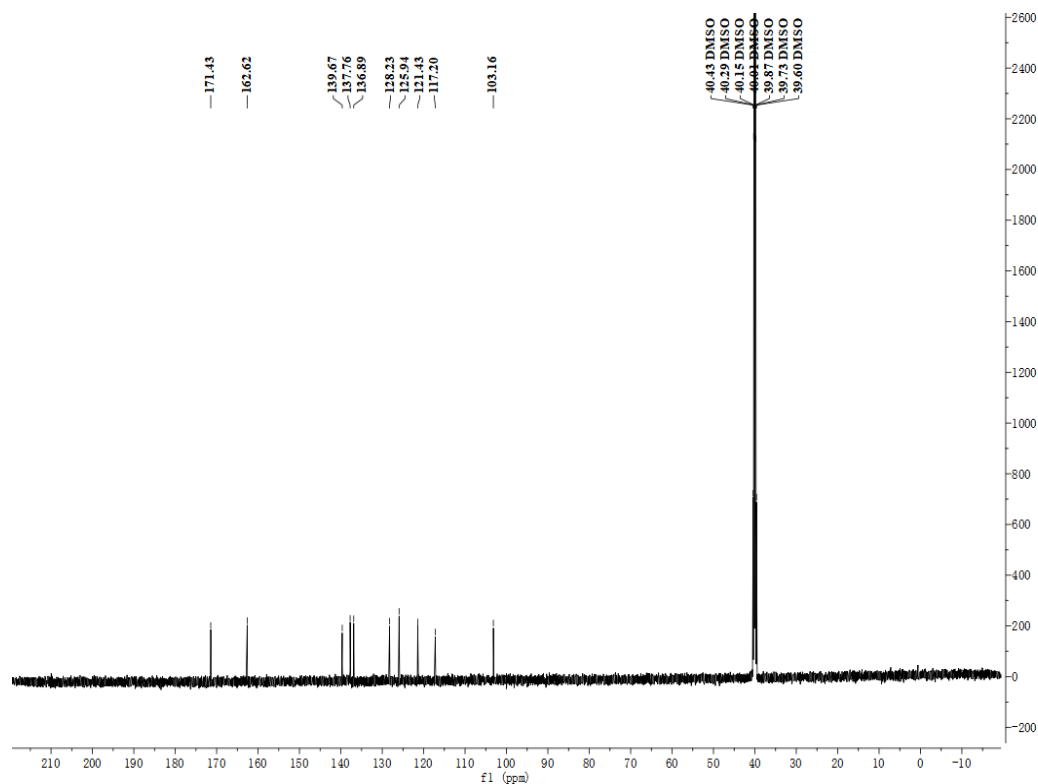

Figure S4.  $^{13}\text{C}$  NMR spectrum of salophen-Br-Zn in  $\text{d}_6$ -DMSO.

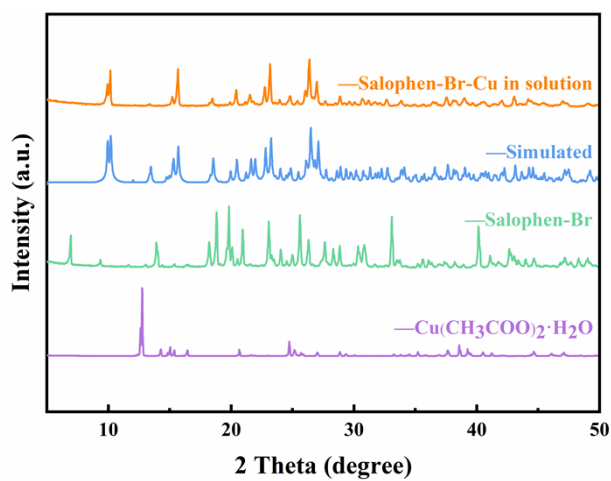

Figure S5. XRD patterns of salophen-Br ligand,  $\text{Cu}(\text{CH}_3\text{COO})_2 \cdot \text{H}_2\text{O}$ , and salophen-Br-Cu prepared in solution and simulation results.

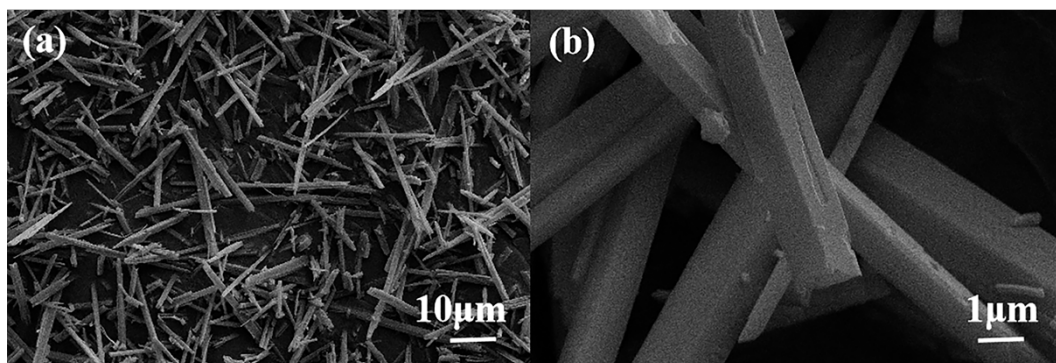

Figure S6. SEM images of salophen-Br-Cu prepared in solution.

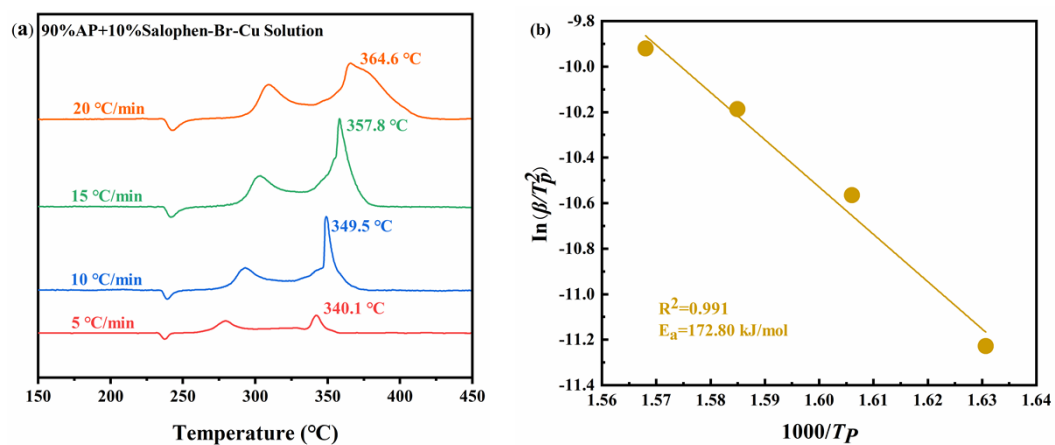

Figure S7. (a) DTA curves for different warming rates of AP+10 wt.% salophen-Br-Cu prepared in solution;  
(b) The dependence of  $\ln(\beta/T_p^2)$  on  $1/T_p$  for AP+10 wt.% salophen-Br-Cu prepared in solution.
